# Supplementary material for: Neighborhood disadvantage and self-rated health in China: latent class analysis of community lifestyles
Source: Research Square preprint supplement (doi:10.21203/rs.3.rs-7414975/v1), 2025-10-17
Supplement: Supplementary file 1 [file b56a5e8346aa5ec69437bbb5.docx]

Appendix

**Table 1:** Determinants of residing in a disadvantaged community: results from logistic regression

|  | **Model1** | **Model2** | **Model1** |
| --- | --- | --- | --- |
| Female | -0.118+ | -0.204** | -0.018 |
|  | (0.069) | (0.074) | (0.093) |
| Age | -0.015 | -0.005 | -0.012 |
|  | (0.018) | (0.019) | (0.020) |
| Married | 0.003 | -0.070 | -0.070 |
|  | (0.111) | (0.120) | (0.122) |
| Urban hukou | -0.894*** | -0.491*** | -0.367*** |
|  | (0.069) | (0.078) | (0.082) |
| Education |  | -0.181*** | -0.155*** |
|  |  | (0.012) | (0.013) |
| Annual household income (log) |  | -0.293*** | -0.292*** |
|  |  | (0.026) | (0.026) |
| Regular physical activity |  |  | -0.116 |
|  |  |  | (0.076) |
| Smoke |  |  | 0.296** |
|  |  |  | (0.113) |
| Drink |  |  | 0.014 |
|  |  |  | (0.113) |
| Bmi index |  |  | 0.034** |
|  |  |  | (0.010) |
| health insurance |  |  | -0.489*** |
|  |  |  | (0.086) |
| cons | 0.151 | 4.132*** | 3.658*** |
|  | (0.311) | (0.390) | (0.429) |
| N | 3625 | 3625 | 3625 |
| Pseudo R2 | 0.0367 | 0.1347 | 0.1454 |

+ *p* < 0.1, * *p* < 0.05, ** *p* < 0.01, *** *p* < 0.001
